# Supplementary material for: Comparative transcriptome analyses of seven anurans reveal functions and adaptations of amphibian skin
Source: PubMed Central journal article supplement (PMC4819189; doi:10.1038/srep24069), 2016-04-04
Supplement: srep24069-s1.pdf [file srep24069-s1.pdf]

1 Comparative transcriptome analyses of seven anurans reveal functions and  
2 adaptations of amphibian skin

3 Li Huang<sup>#</sup>, Jun Li<sup>#</sup>, Housseni Anboukaria, Zhenhua Luo, Mian Zhao, Hua Wu<sup>\*</sup>

4

5 **Supplementary Figure S1.** The top enriched PI3K-Akt signaling pathway (ko:  
 6 04151).

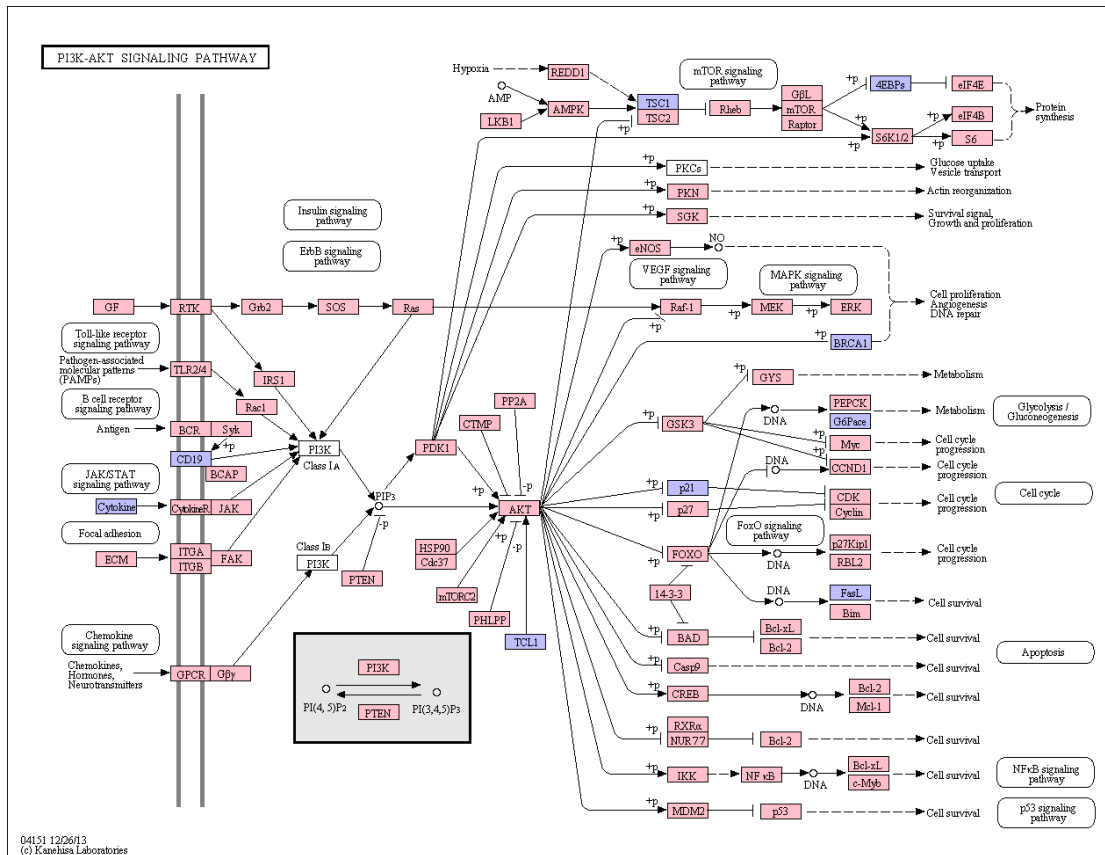

7  
 8

9 **Supplementary Figure S2.** Phylogenetic relationship among the seven anurans  
10 species. Species names were abbreviated as: *L.boringii* - Lb, *M. sangzhiensis* - Ms, *O.*  
11 *margaretae* - Om, *P. megacephalus* - Pm, *P. nigromaculatus* - Pn, *R. dennysi* - Rd, *R.*  
12 *omeimontis* - Ro, *Xenopus tropicalis* – Xt and *Latimeria chalumnae* – Lc. Xt and Lc  
13 were selected to be outgroup species.

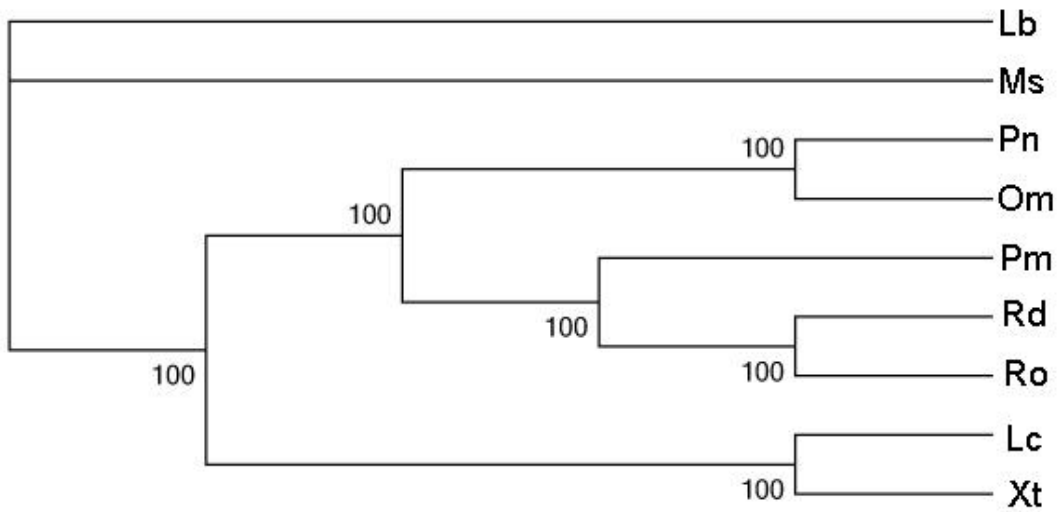

14

15 **Supplementary Figure S3. The Hematopoietic cell lineage pathway (ko04640)**

16 involved by CD9 antigen.

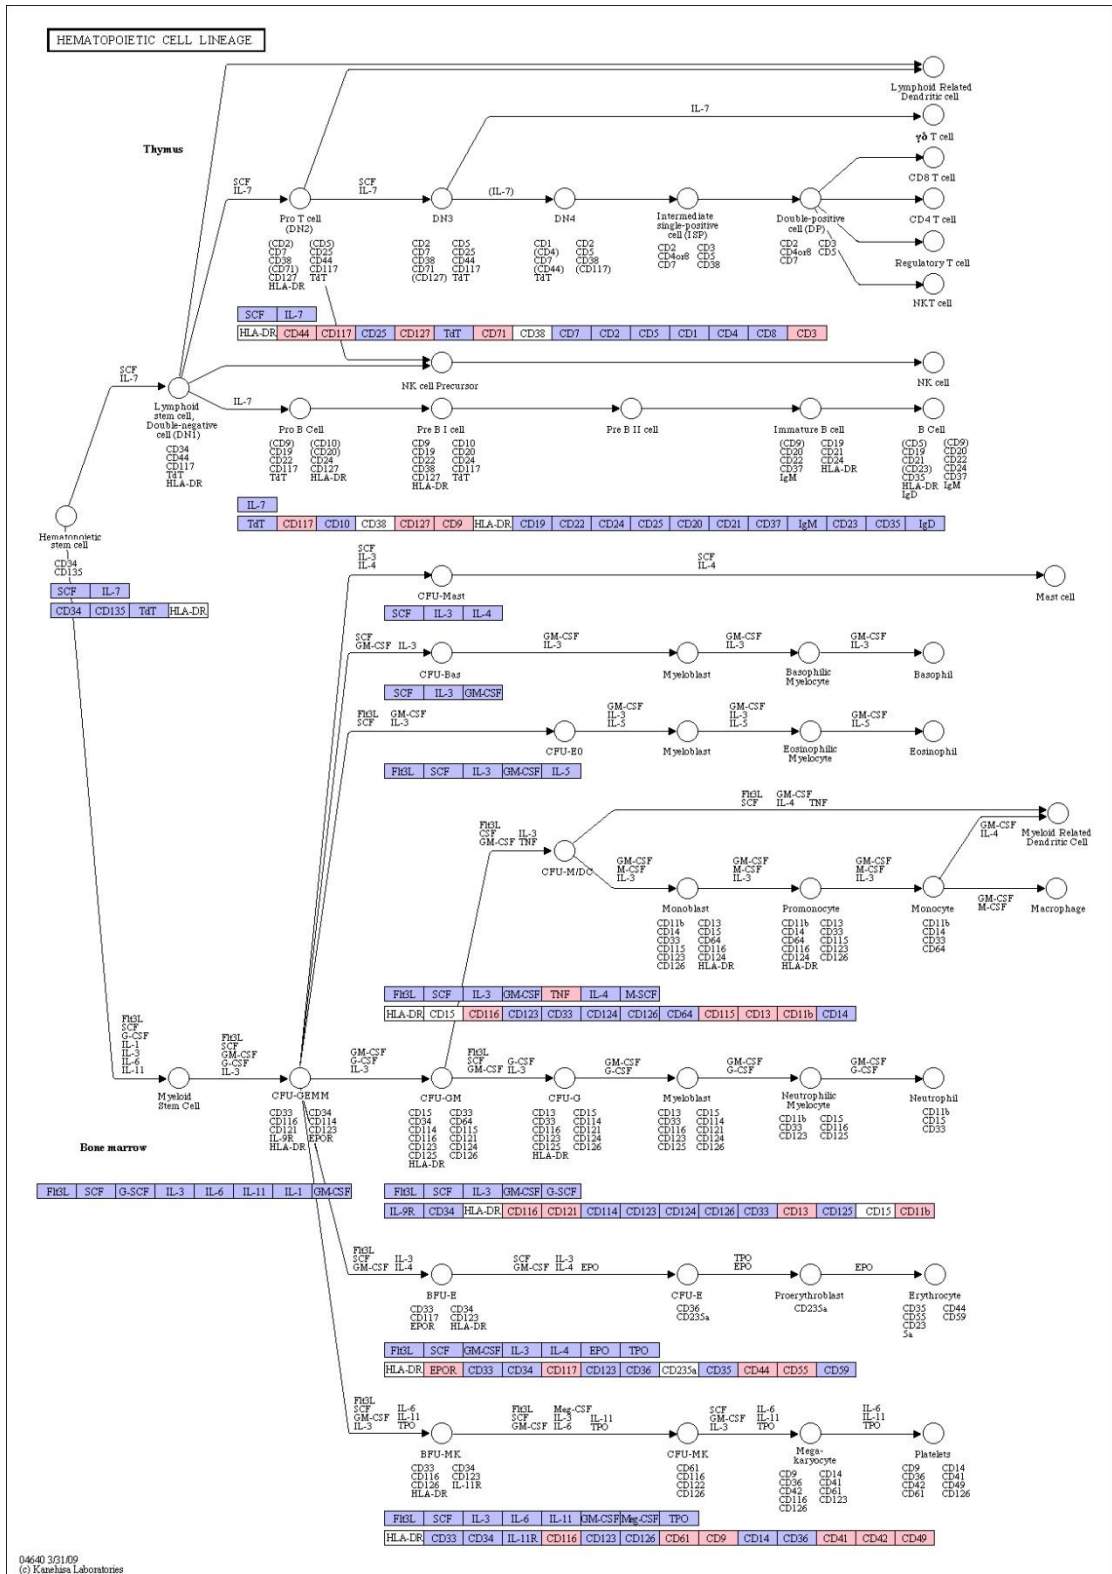

17  
18
